# Supplementary material
Source: PubMed Central journal article supplement (PMC4065854)
Supplement: NIHMS589663-supplement-303883R2_Acknowledgement_Permissions.pdf [file NIHMS589663-supplement-303883R2_Acknowledgement_Permissions.pdf]

## Circulation Research

---

**From:** Chris Stoeckert <stoeckrt@upenn.edu>  
**Sent:** Sunday, April 20, 2014 6:41 PM  
**To:** circulation.research@circresearch.com  
**Cc:** Peter F. Davies  
**Subject:** Permission to be acknowledged in CIRCRES/2014/303883R1

Dear Editor,

I grant permission to be acknowledged in the manuscript:

CIRCRES/2014/303883R1: Hemodynamic disturbed flow induces differential DNA methylation of endothelial Kruppel-like Factor 4 (KLF4) promoter in vitro and in vivo by Jiang et al

Chris Stoeckert, Ph.D.  
Research Professor of Genetics  
1415 Blockley Hall, 423 Guardian Dr. University of Pennsylvania  
Philadelphia, PA 19104  
Ph: 215-573-4409 FAX: 215-573-3111  
<http://www.cbil.upenn.edu>

## Circulation Research

---

**From:** Scott Diamond <sld@seas.upenn.edu>  
**Sent:** Sunday, April 20, 2014 9:56 PM  
**To:** circulation.research@circresearch.com  
**Cc:** Peter F Davies

I approve my acknowledgement  
Scott L Diamond

CIRCRES/2014/303883R1: Hemodynamic disturbed flow induces differential DNA methylation of endothelial Kruppel-like Factor 4 (KLF4) promoter in vitro and in vivo by Jiang et al

The Editor's letter states that: "All persons acknowledged by name in the manuscript must send an email to [circulation.research](mailto:circulation.research)

## Circulation Research

---

**From:** Elisabetta Manduchi <manduchi@mail.med.upenn.edu>  
**Sent:** Sunday, April 20, 2014 8:53 PM  
**To:** circulation.research@circresearch.com  
**Cc:** Peter F Davies  
**Subject:** CIRCRES/2014/303883R1

With this email I give permission to be acknowledged in the manuscript:

CIRCRES/2014/303883R1: Hemodynamic disturbed flow induces differential DNA methylation of endothelial Kruppel-like Factor 4 (KLF4) promoter in vitro and in vivo by Jiang et al

Regards,  
Elisabetta Manduchi
